# Supplementary material for: Expandable and Rapidly Differentiating Human Induced Neural Stem Cell Lines for Multiple Tissue Engineering Applications
Source: PubMed Central journal article supplement — Stem Cell Reports. 2016 Aug 25;7(3):557–70. doi: 10.1016/j.stemcr.2016.07.017 (PMC5032182; doi:10.1016/j.stemcr.2016.07.017), 2016-08-25
Supplement: mmc1.pdf [file mmc1.pdf]

**Stem Cell Reports, Volume 7**

**Supplemental Information**

**Expandable and Rapidly Differentiating Human Induced Neural Stem  
Cell Lines for Multiple Tissue Engineering Applications**

**Dana M. Cairns, Karolina Chwalek, Yvonne E. Moore, Matt R. Kelley, Rosalyn D. Abbott, Stephen Moss, and David L. Kaplan**

**Supplemental Figures:**

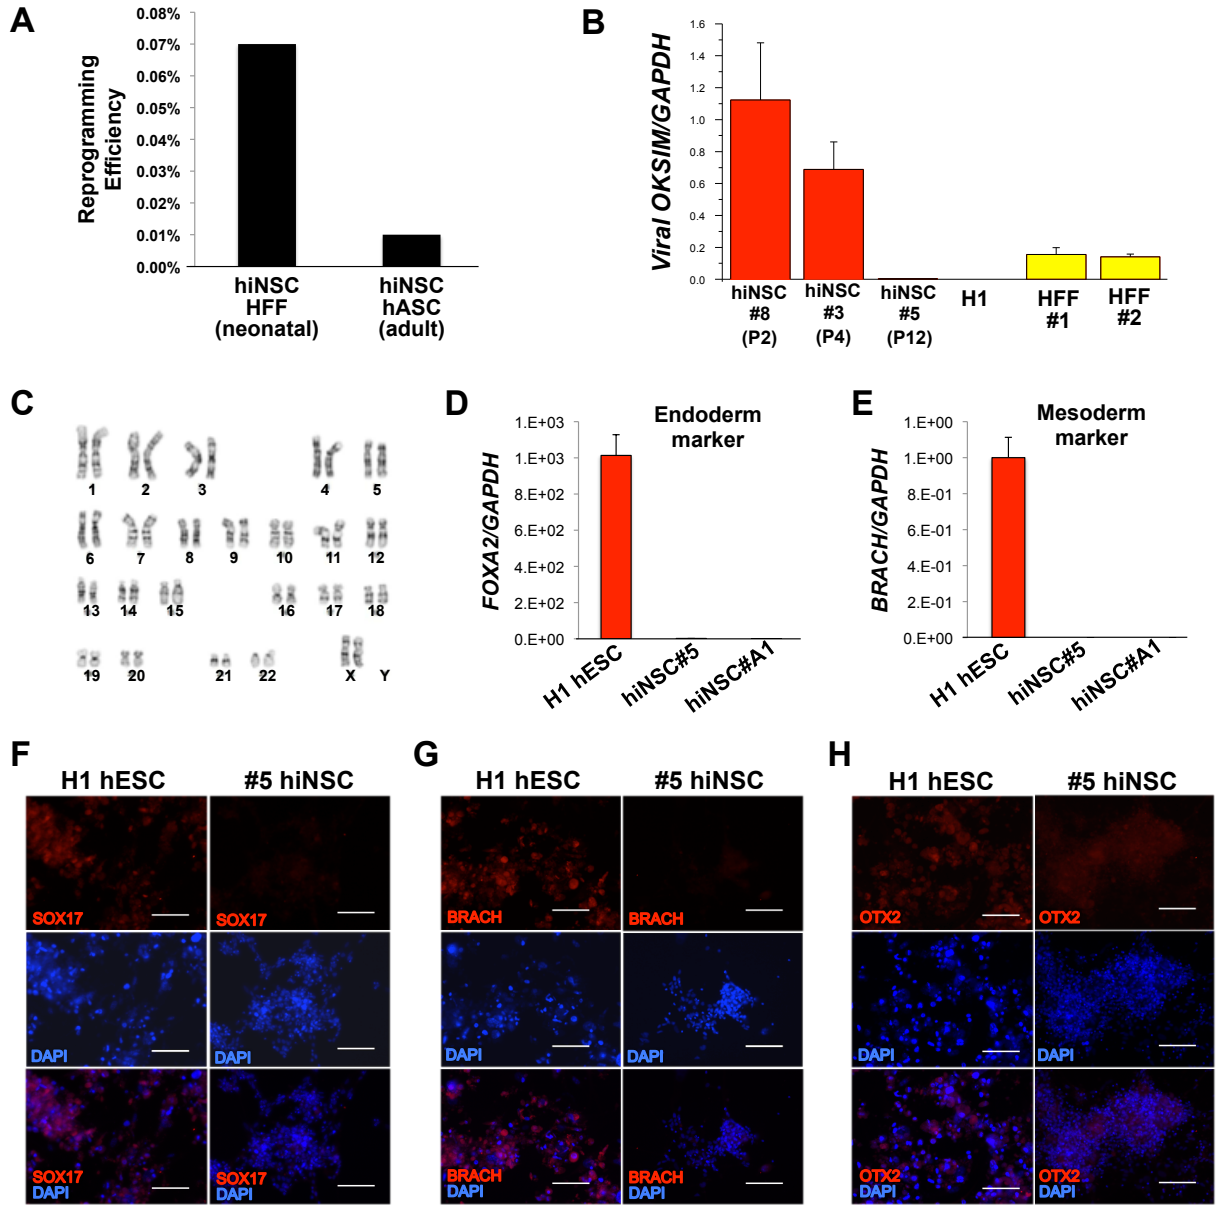

**Figure S1. Related to Figure 2. Further characterization of hiNSC lines.** (A) hiNSC reprogramming efficiency using various human cell types. (B) hiNSCs demonstrate a loss of exogenous transgene expression. Expression of the exogenous transgenes introduced via polycistronic lentiviral infection is lost upon increased passage of clonal hiNSC lines. Data represents means  $\pm$  SD of 3 independent experiments. (C) hiNSCs display a normal karyotype. Example of a karyotype from resulting hiNSC line A1. (D,E) hiNSC colonies do not express markers of other germ layers. qRT-PCR analysis of H1 hESC compared to several hiNSC clonal lines demonstrates that hiNSCs do not express markers of endodermal (FOXA2) (D) or mesodermal (BRACHYURY) (E) lineages. Data represents means  $\pm$  SD of 3 independent experiments. (F-H) hiNSCs cannot be induced to form endo- or mesodermal cell lineage. hESCs or hiNSCs were induced to specify endodermal, mesodermal or ectodermal lineage using a human pluripotent stem cell functional identification kit (R&D Systems). In response to specific germ layer inducing factors, hESCs differentiated into (F) SOX17-, (G) BRACHYURY- and (H) OTX2-positive cells, respectively, while hiNSCs did not express markers from endodermal nor mesodermal germ layers (scale bar, 100  $\mu$ m).

**A**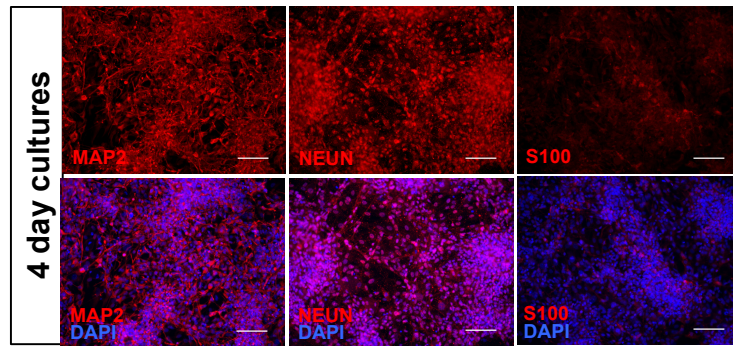**B**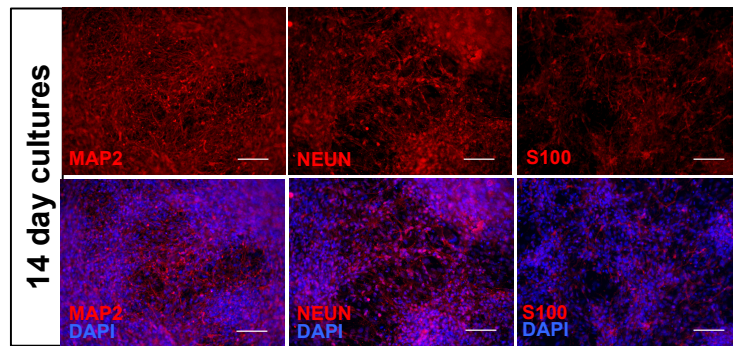

**Figure S2. Related to Figure 3. Differentiated hiNSCs express multiple markers of neuron and glial differentiation.** Spontaneously differentiated hiNSCs express other neuronal and glial markers including MAP2, NEUN and S100 after 4 and 14 days in culture (scale bar, 100  $\mu$ M).

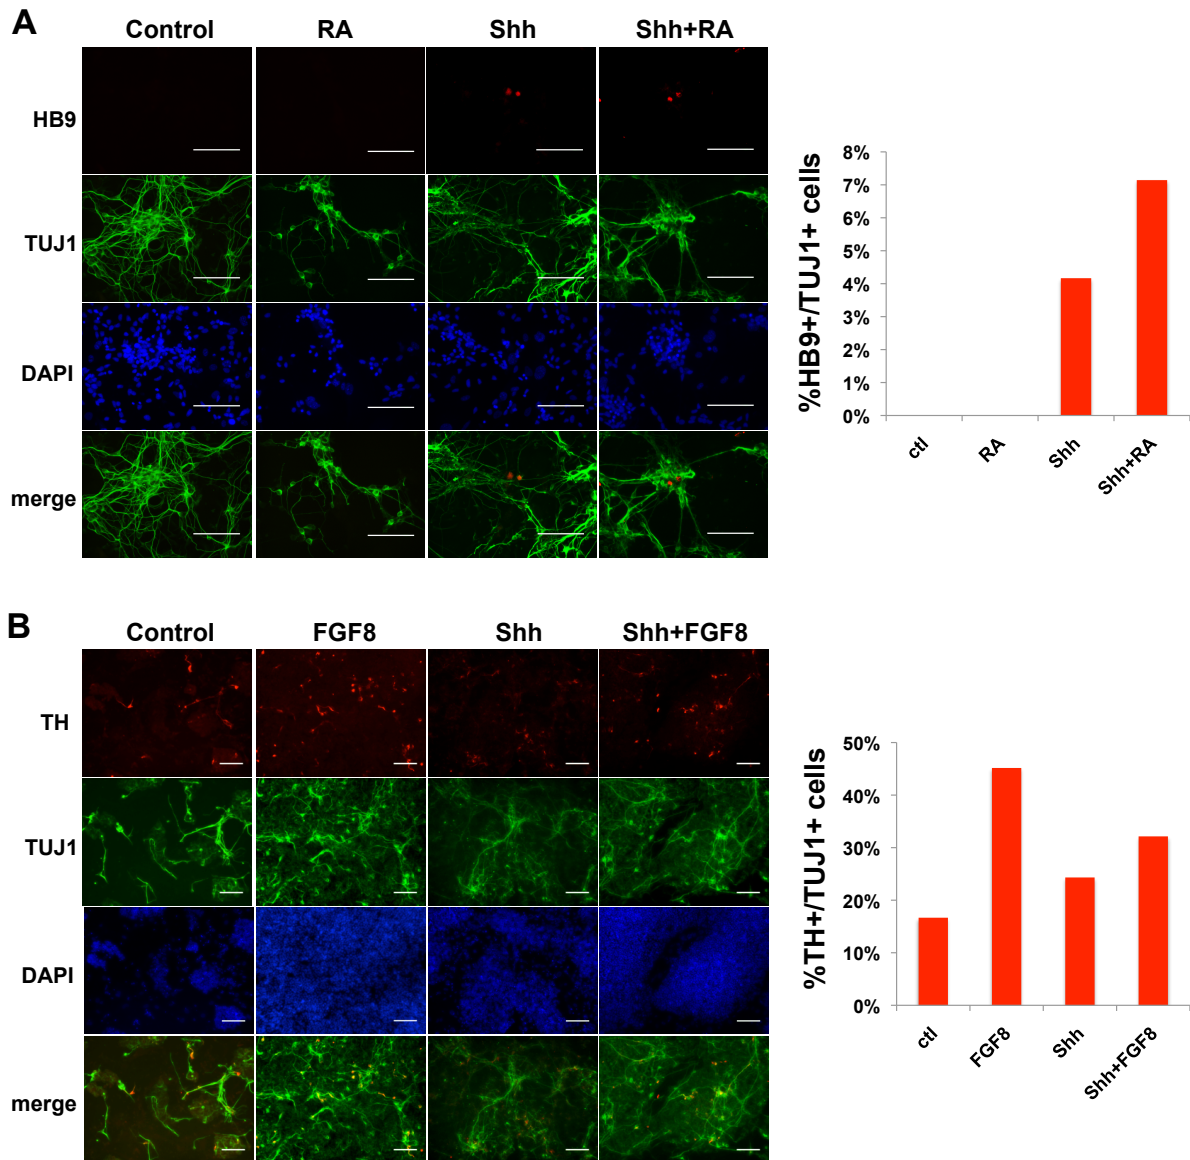

**Figure S3. Related to Figure 3. hiNSCs can be directed to specific subtypes using growth factors: guidance of hiNSCs toward motor or dopaminergic neuron lineage.** The addition of Shh and RA to Neurobasal media results in an increase in expression of HB9, a marker of motor neurons, after one week in culture (A). The addition of FGF8 and Shh to Neurobasal media results in an increase in expression of TH, a marker of dopaminergic neurons, after one week in culture (B).

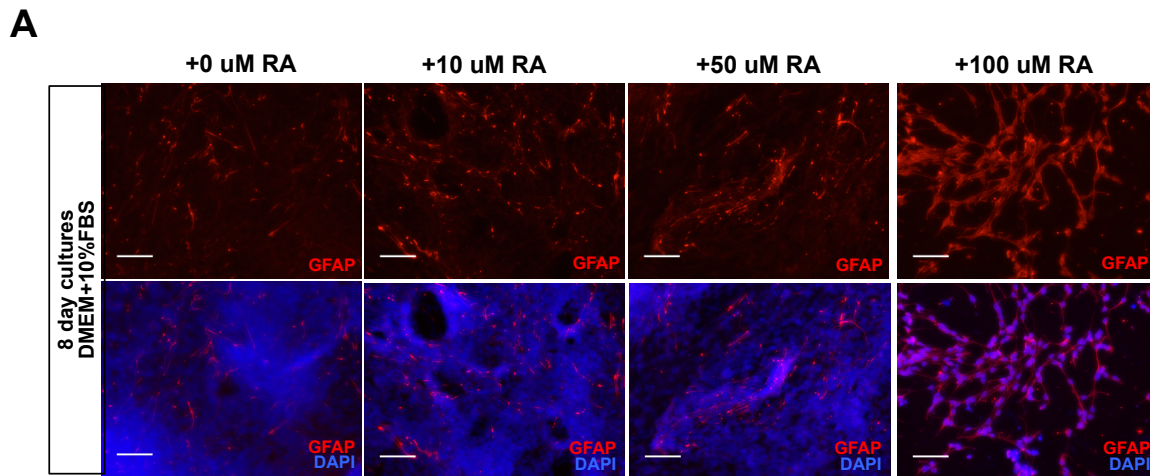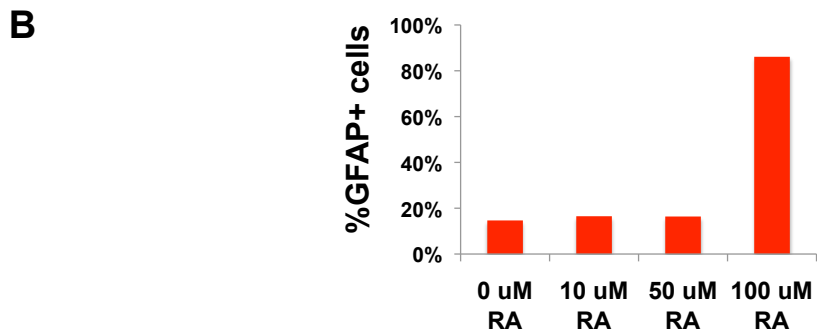

**Figure S4. Related to Figure 3. hiNSCs can be directed to specific subtypes using growth factors: guidance of hiNSCs toward glial lineage.** The addition of RA to DMEM+10%FBS media results in a dramatic increase in glial marker GFAP expression, after 8 days in culture.

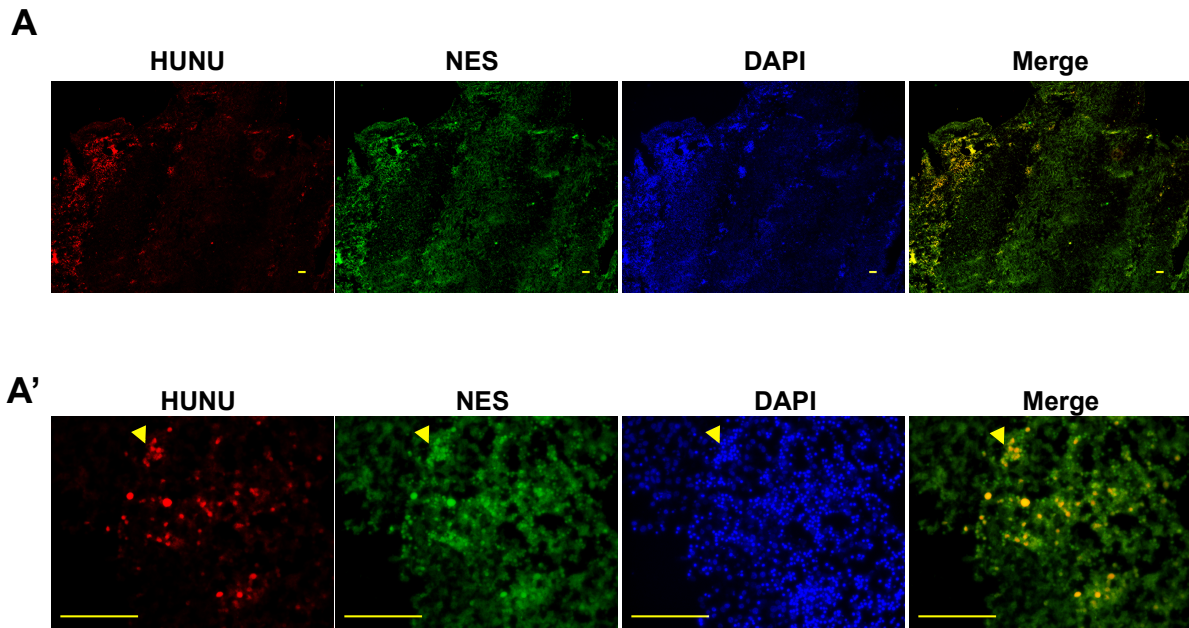

**Figure S5. Related to Figure 5. Injected hiNSCs migrate out of the neural tube and engraft in multiple locations.** hiNSCs were injected into early stage chick embryos, and allowed to grow for 6 days. Frontal sections through the spinal cord demonstrate the presence of human cells as indicated by human nuclear antigen (HUNU) immunostaining, which co-localizes exclusively with neural stem cell marker NESTIN (scale bar, 100  $\mu$ M).

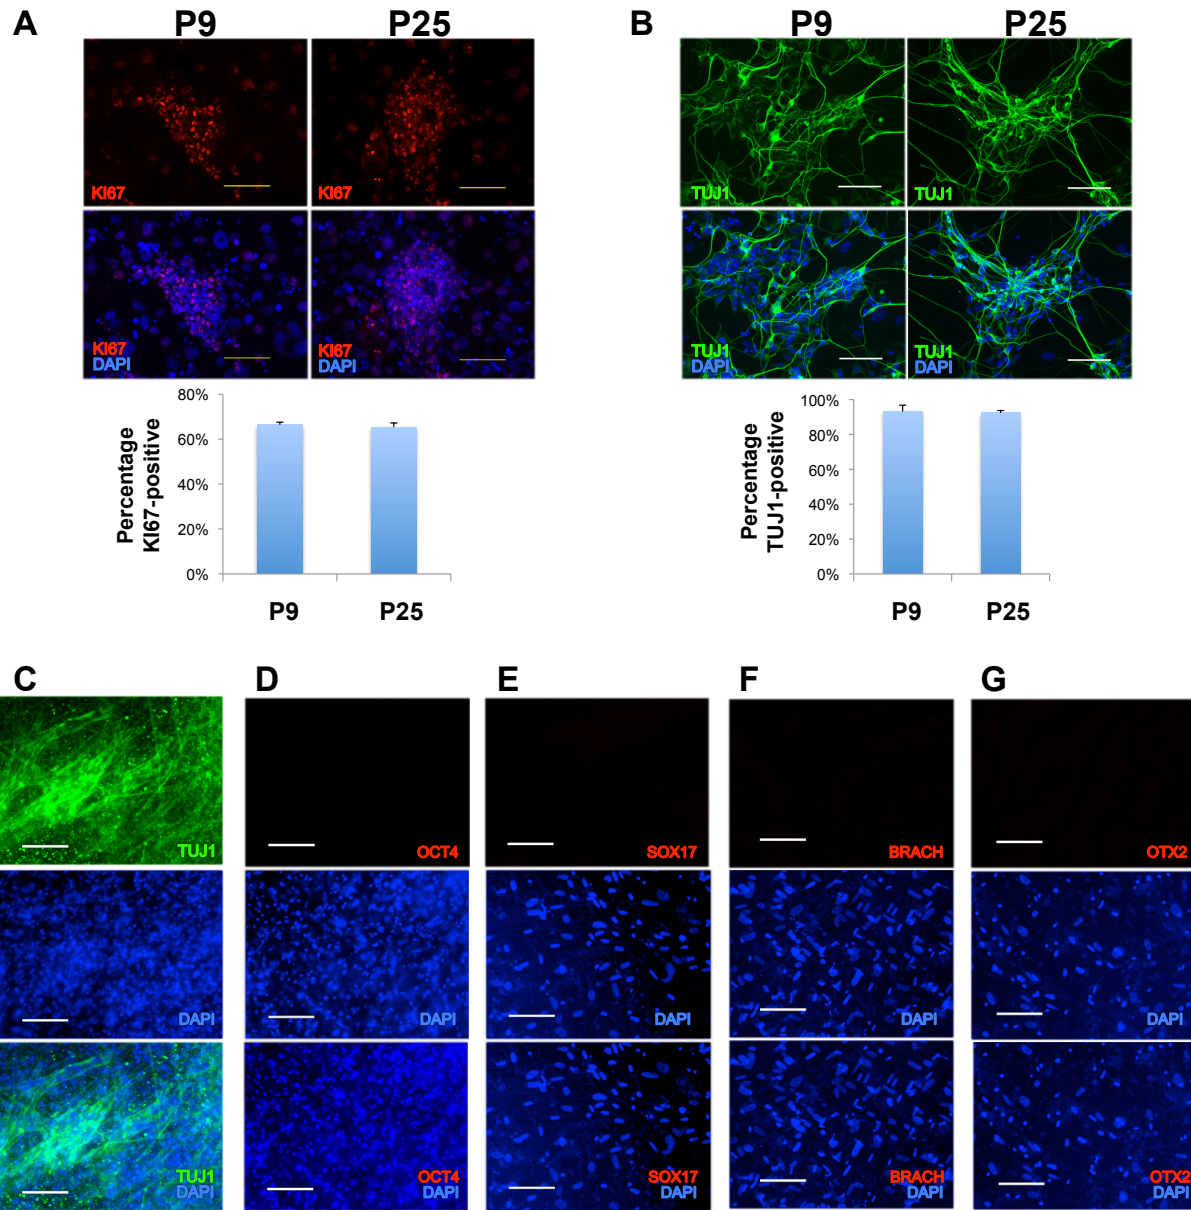

**Figure S6. Related to Figures 2 and 3. hiNSCs demonstrate phenotypic stability.** hiNSCs retain proliferative (A) and neurogenic differentiation capacity (B) upon being frozen, thawed and passaged multiple times. hiNSC lines were frozen as colonies at passage 3 (P3) and subsequently thawed and expanded on MEF feeder layers for multiple passages and analyzed for KI67 expression (A). To induce differentiation, hiNSC colonies were enzymatically dissociated and subcultured on gelatin substrate for 4 days and assayed for TUJ1 expression (B). Data (A,B) represents means  $\pm$  SD of 3 independent experiments. hiNSCs in long term culture do not spontaneously induce expression of pluripotency marker OCT4 or germ layer markers. hiNSC lines were cultured *in vitro* on gelatin (in Knockout DMEM, 20% xeno-free serum replacement, 1% Glutamax, 1% antibiotic-antimycotic, and 0.1 mM  $\beta$ -mercaptoethanol, media which could allow for the growth of any potential pluripotent cells resident in this population) for 16 weeks then assayed for neuronal marker TUJ1 (A), pluripotent marker OCT4 (B), endodermal marker SOX17 (C), mesodermal marker BRACHYURY (D) and ectodermal marker OTX2 (E). Only neuronal marker expression was detectable after this extended period of time in culture (scale bar, 100  $\mu$ M).

**Supplemental Tables:**

| Host                        | Antigen              | Vendor          | Catalog #   |
|-----------------------------|----------------------|-----------------|-------------|
| Rabbit                      | OCT4                 | Stemgent        | 09-0023     |
| Rabbit                      | SOX2                 | Stemgent        | 09-0024     |
| Rabbit                      | NANOG                | Stemgent        | 09-0020     |
| Mouse                       | SSEA4                | Stemgent        | 09-0006     |
| Mouse                       | TRA-1-81             | Stemgent        | 09-0011     |
| Rabbit                      | PAX6                 | Stemgent        | 09-0075     |
| Rabbit                      | SOX1                 | Abcam           | ab87775     |
| Rabbit                      | NESTIN               | Sigma           | N5413       |
| (APC-conjugated)            | CD133                | Miltenyi Biotec | 130-098-829 |
| Rabbit                      | KI67                 | Abcam           | ab15580     |
| Rabbit                      | TUJ1                 | Abcam           | ab18207     |
| Mouse                       | TUJ1                 | Sigma           | T8578       |
| Mouse                       | GFAP                 | Sigma           | G3893       |
| Rabbit                      | GFAP                 | Sigma           | G9269       |
| Mouse                       | TH                   | Sigma           | T1299       |
| Rabbit                      | SLC32A1/VGAT         | Sigma           | SAB2700790  |
| Rabbit                      | VGLUT2               | Sigma           | V2514       |
| Rabbit                      | VGLUT1               | Sigma           | V0389       |
| Mouse                       | GEPHYRIN             | Abcam           | ab124385    |
| Mouse                       | PSD95                | Sigma           | p246        |
| Rabbit                      | SYNAPTOPHYSIN        | Abcam           | ab32594     |
| Rabbit                      | PAN NAV              | Alomone         | ASC-003     |
| Rabbit                      | S100 $\beta$         | Millipore       | 04-1054     |
| Rabbit                      | MBP                  | Millipore       | AB980       |
| Mouse                       | O4                   | Millipore       | MAB345      |
| Mouse                       | HUNU                 | Millipore       | MAB1281     |
| Cy3-conjugated mouse        | HUNU                 | Millipore       | MAB4383C3   |
| Mouse                       | HB9                  | DSHB            | 81.5C10     |
| Mouse                       | NF (sensory/motor)   | DSHB            | E1.9        |
| Rabbit                      | MAP2                 | Sigma           | M3696       |
| Rabbit                      | NEUN                 | Abcam           | ab104225    |
| Rabbit                      | S100                 | Abcam           | ab76729     |
| Mouse                       | MHC                  | DSHB            | MF20        |
| Mouse                       | ISLET1/2             | DSHB            | 39.4D5      |
| Mouse                       | Schwann cell protein | DSHB            | 4E2(3G2)    |
| Alexa 647 conjugated        | Bungarotoxin         | Invitrogen      | B-13423     |
| Goat (Alexa 488 conjugated) | Rabbit IgG           | Invitrogen      | A-11070     |
| Goat (Alexa 594 conjugated) | Rabbit IgG           | Invitrogen      | A-11072     |
| Goat (Alexa 488 conjugated) | Mouse IgG            | Invitrogen      | A-11017     |
| Goat (Alexa 594 conjugated) | Mouse IgG            | Invitrogen      | A-11020     |

**Table S1.** Table of antibodies used for immunostaining.



| Gene                       | Accession No.          | Sequence 1 (5' → 3')      | Sequence 2 (5' → 3')     |
|----------------------------|------------------------|---------------------------|--------------------------|
| endo <i>OCT4</i>           | NM_002701.5/KF880691.1 | AAACCCTGGCACAAACTCC       | GACCAGTGCCTTTCCTCTG      |
| endo <i>SOX2</i>           | NM_003106.3/JQ231229.1 | CACATGTCCCAGCACTACC       | CCATGCTGTTTCTTACTCTCCTC  |
| <i>NANOG</i>               | NM_024865.3            | TCCTTGCAAATGCTTTCTGCT     | CAGGGCTGCCTGAATAAGC      |
| <i>PAX6</i>                | NM_000280.4            | TCCGTTGGAAGTATGGAGT       | GTTGGTATCCGGGACTTC       |
| <i>SOX1</i>                | NM_005986.2            | ATTATTTTGCCGTTTTCCC       | TCAAGGAAACACAATCGCTG     |
| <i>SOX11</i>               | NM_003108.3            | TTTTCAAGCTCCCTGCAGTT      | AGGGACCATTGCAACTTTTG     |
| <i>OLIG1</i>               | NM_138983.2            | TGGTTACGCTACTTTTGGGG      | CCAGTGTTTTGTGCGAGAGA     |
| <i>OLIG2</i>               | NM_005806.3            | CTGGCGTCCGAGTCCAT         | CCTGAGGCTTTTCGGAGC       |
| <i>MUSASHI</i>             | NM_002442.3            | GTGAAGGAGTGTCTGGTGATG     | GATTGCGCCAGCACTTTATC     |
| <i>DCX</i>                 | NM_000555.3            | TCAGGACCACAGGCAATAAA      | AGACCGGGGTTGTCAAAAA      |
| <i>PLZF</i>                | NM_006006.4            | TTCTCAGCCGCAAATATCC       | ATAACGAGGCTGTGGAGCAG     |
| <i>CD133</i>               | NM_006017.2            | TTTTGGATTATATGCCTTCTGT    | ACCCATTGGCATTCTCTTTG     |
| <i>NESTIN</i>              | NM_006617.1            | AGAACTCCCGGCTGCAAAC       | TCTGGGTCCTAGGGAATTG      |
| <i>NCAM</i>                | NM_000615.6            | ACTCTCCAACGCTGATCTCC      | CAGCCAGCAGATTACAATGC     |
| <i>TUJ1</i>                | NM_001197181.1         | GCTCAGGGGCCTTTGGACATCTCTT | TTTTCACTCCTTCCGCACCACATC |
| polycistronic <i>OKSIM</i> | N/A                    | GACCACCTCGCCTTACACAT      | TTCAGCTCCGCTCCATCAT      |
| <i>FOXA2</i>               | NM_021784.4            | TACGTGTTTCATGCCGTTTCAT    | CGACTGGAGCAGCTACTATGC    |
| <i>BRACHYURY</i>           | NM_003181.3            | CCCTATGCTCATCGGAACAA      | CAATTGTCATGGGATTGCAG     |

**Table S2.** Table of qRT-PCR primer sequences.

**Supplemental Movie (separate file):**

**Movie S1. Related to Figure 6. hiNSCs demonstrate functional calcium signaling in a 3D brain model.** Video of live calcium imaging (using the Fluo4AM calcium indicator) of hiNSCs cultured in 3D brain donut model for 3 weeks. Video shows spontaneous firing between neurons.

## **Supplemental Experimental Procedures:**

### **Polycistronic lentivirus production for reprogramming**

To generate pluripotent stem cells from somatic cells, a vector that expresses the reprogramming factors OCT4, KLF4, SOX2, and cMYC in a polycistronic lentivirus was used (Addgene #24603, a gift from Jose Cibelli). This polycistronic lentivirus also contains a LoxP site that allows for transgene removal upon addition of Cre-recombinase. HEK293 cells were used for packaging the virus. These cells were grown in DMEM, 10% fetal bovine serum (FBS), and 1% antibiotic-antimycotic. The cells were co-transfected with the lentivirus construct, and psPAX and pMD2.G packaging vectors (Addgene #12260 and 12259, gifts from Didier Trono) using Fugene (Roche). Culture medium was harvested 24- and 48-hrs post-transfection. Viral particles were concentrated using Lenti-X concentrator (Clontech), then centrifuged at 3000 rpm. Concentrated viruses were titered and subsequently stored at -80°C until further use.

### **Pluripotent stem cell and neural stem cell culture**

The H1 human ES cell line (Wicell) was grown on mouse embryonic fibroblast feeder layers inactivated by mitomycin C treatment in Knockout (KO) DMEM supplemented with 20% KO serum replacement (not xeno-free), 10 ng/mL recombinant bFGF, 1% Glutamax, 1% antibiotic-antimycotic, and 0.1 mM  $\beta$ -mercaptoethanol (Invitrogen). Colonies were expanded by enzymatically passaging using TrypLE (Invitrogen). Commercially available cell lines were cultured as controls for human neural stem cells. H9-NSCs (Invitrogen) are neural stem cells derived from H9 hESC lines. Human neural progenitors (hNPs, ReNcell) are an immortalized human neural progenitor cell line derived from human fetal brain tissue. Both H9-NSCs and hNPs were cultured using hiNSC media, on gelatin and laminin (Roche) coated plates, respectively.

### **Differentiation into neuronal and glial phenotypes**

For spontaneous differentiation, hiNSC colonies were enzymatically removed from MEF feeder layers using TrypLE (Invitrogen), then dissociated by manual pipetting. Larger aggregates were removed from cell suspension using a 40-70  $\mu$ M cell strainer. Dissociated hiNSCs were plated and cultured on multiple substrates including laminin (Roche) or gelatin in hiNSC basal media without bFGF or in Neurobasal media supplemented with 2% B27 (Invitrogen), 1% Glutamax, and 1% antibiotic-antimycotic. For guided differentiation, Shh (500 ng/ml, Peprotech), FGF8 (500 ng/ml, Peprotech), and RA (R&D) at concentrations between 10-100  $\mu$ M were used to facilitate neuronal and glial differentiation within shorter culture periods (~7-8 days). For differentiation studies in undefined media, DMEM supplemented with 10% FBS and 1% antibiotic-antimycotic was used.

### **Co-culture of hiNSCs with skeletal muscle cells**

C2C12 murine myoblast cell line (ATCC) was cultured in DMEM+10%FBS (Invitrogen). For skeletal muscle differentiation, cells were cultured at high confluence in DMEM+1%FBS to induce myotube formation. hiNSC colonies that had been removed from feeders and subcultured on gelatin in hiNSC media (without bFGF) for 2 weeks were subsequently trypsinized with TrypLE, then passaged onto differentiating C2C12 cultures. Co-cultures were maintained for 4-5 days, and fixed for immunofluorescent analysis.

### **3D cortical brain tissue model**

A 3D cortical brain tissue model was generated as previously described (17, 18). Briefly, porous, silk protein sponges were generated and biopsy punched into 6 mm discs, with 2 mm holes in the center to form donut shaped scaffolds. These scaffolds were autoclaved and coated with laminin (0.5 mg/ml) (Roche, Indianapolis, IN). Dissociated hiNSCs were seeded into the scaffolds at a density of  $1 \times 10^6$  and allowed to adhere overnight. The following day, collagen gels were made using rat tail collagen (Corning, Bedford, MA, USA) as previously described. 3D tissue models were then cultured in neurobasal media (Invitrogen, Carlsbad, CA) supplemented with 2% B27 (Invitrogen, Carlsbad, CA), 0.5 mM Glutamax, and 1% antibiotic-antimycotic (Invitrogen, Carlsbad, CA) for up to 12 weeks, with media changes every 3 days.

### **Immunofluorescence**

Briefly, cells grown in culture plates, on coverslips, or in 3D silk scaffold cultures were fixed in 4% paraformaldehyde, then washed with 1X phosphate-buffered saline (PBS). Samples were incubated with blocking buffer consisting of PBS containing 10% goat serum and 0.1% triton X-100. Primary antibodies were added to blocking buffer, and incubated with samples overnight at 4°C. The following day, samples were washed several times with PBS, then incubated with a corresponding fluorescently-conjugated secondary antibody in blocking

buffer, for 1 hour at room temperature (away from light). Nuclei were counterstained with DAPI (Invitrogen). For immunostaining samples from *in vivo* studies, 4% paraformaldehyde-fixed cryosectioned tissues were used following a similar immunostaining protocol. All antibodies used in this study are listed in Table S1.

### **qRT-PCR**

Total RNA was isolated using the RNeasy Mini kit (Qiagen), and cDNA was generated using MLV-reverse transcriptase (Invitrogen, CA) according to the manufacturers' protocols. Quantitative RT-PCR was performed on the iQ5 Real-Time PCR Detection System (BioRad) and normalized against the housekeeping gene GAPDH. All primer sequences are listed in Table S2.

### **Calcium imaging**

Cells plated onto coverslips or on 3D scaffolds were immersed in extracellular solution (NaCl 140 mM, KCl 2.8 mM, CaCl<sub>2</sub> 2 mM, MgCl<sub>2</sub> 2 mM, HEPES 10 mM, glucose 10 mM, pH = 7.4, adjusted with NaOH). Fluo-4 (Invitrogen) calcium sensitive dye was mixed 1:1 with 20% Pluronic F127 (Invitrogen). Next, Fluo-4 was diluted to a final concentration of 1  $\mu$ M in the extracellular buffer and pre-warmed to 37°C. The Fluo-4 1  $\mu$ M solution was applied to cells and incubated at 37°C for 1 hour. Upon incubation, cells were washed with the extracellular buffer to remove any unreacted dye. Cells were imaged using Olympus MVX10 microscope (12.6x magnification) and Hamamatsu ORCA-Flash4.0 camera. The images were taken with the following setup: 15 ms exposure, 60 ms frame frequency, 512x512 pixel, 4x4 binning, 1000 frames/minute over 3 minutes at room temperature. Some samples were treated with 200  $\mu$ M picrotoxin (Sigma-Aldrich) just before imaging. The movie was created using ImageJ software (NIH).

### **Electrophysiology**

hiNSCs were grown on poly-L-lysine coated coverslips (Corning) in Neurobasal media supplemented with 2% B27, 1% Glutamax, and 1% antibiotic-antimycotic for 1-8 weeks. Whole cell patch clamp technique was used for all recordings using glass electrodes (3-6 M $\Omega$ ) and were performed at 34°C. Pipette saline contained (in mM): 130 K-gluconate, 10 KCl, 0.1 CaCl<sub>2</sub>, 2 Mg-ATP, 1.1 EGTA, and 10 HEPES, pH 7.4 KOH. Bath saline contained the following (in mM): 140 NaCl, 2.5 KCl, 2.5 CaCl<sub>2</sub>, 1.2 MgCl<sub>2</sub>, 10 HEPES, and 11 glucose, pH 7.4 NaOH. To determine the functionality of GABA<sub>A</sub> receptors, muscimol (1  $\mu$ M) was applied onto 1-week old hiNSC using a three-barreled 700  $\mu$ m pipe positioned next to the cell (Warner Instruments), and responses were recorded in current clamp (I=0). To determine if 8 week old hiNSCs were capable of generating action potentials, we performed current clamp experiments (1-second duration, 20 pA steps, covering a range from -100 pA to +300 pA). To assess the ability of hiNSCs to generate spontaneous action potentials, recordings were made in current clamp (I=0 mode). All data were obtained with an Axopatch 200B amplifier and pclamp 10 software (Molecular Devices LLC, Sunnyvale, CA, USA), and analyzed offline using Clampfit. All recordings were digitized at 10 kHz.

### **Injection of hiNSCs into chick embryos**

hiNSCs were enzymatically removed from MEF feeder layers using TrypLE (Invitrogen), and subsequently dissociated by manual pipetting to achieve a single cell suspension. Cells were then fluorescently labeled using DiD (Invitrogen) and washed repeatedly to remove excess dye. Hamburger Hamilton Stage 16 (~55 hours of incubation) chicken embryos (UConn) were used. Briefly, a small window was made in the eggshell to access the embryo, and PBS with antibiotic-antimycotic was added to prevent infection. Fast green dye (1  $\mu$ l) was added to the cell suspension to visualize the location of the injected cells. Cells entered a pulled borosilicate glass needle by capillary action, and were subsequently injected into the lumen of the developing chick neural tube using a micromanipulator (Parker Picospritzer II). The windowed egg was then sealed using tape. Embryos were harvested and fixed with 4% paraformaldehyde between 1-8 days post-injection for subsequent analysis. Embryos to be cryosectioned were first equilibrated in 15% sucrose-PBS solution, then embedded in OCT. Sections of 10  $\mu$ m thickness were prepared on slides using a cryostat (Leica).

### **Microscopy**

Brightfield and fluorescent images were obtained using a Keyence BZ-X700 microscope and associated software. Images of 3D fluorescence were taken using confocal or two photon excited fluorescence (TPEF) using a Leica (Wetzlar, Germany) DMIRE2 microscope with a TCS SP2 scanner. Live calcium imaging was performed using Olympus MVX10 microscope.

### **Statistics**

All data are expressed as mean  $\pm$  SD, with at least 3 independent samples analyzed per experiment. Data

demonstrating any statistically significant differences were determined by 1-factor ANOVA with post-hoc Tukey test using the statistics software SYSTAT12 (Systat). A p-value less than 0.05 was considered significant.
